# Supplementary material
Source: Springer Nature journal article supplement (https://www.springermedizin.de/resource/supplementary/13046_2008_119_MOESM2_ESM.pdf/9661672)

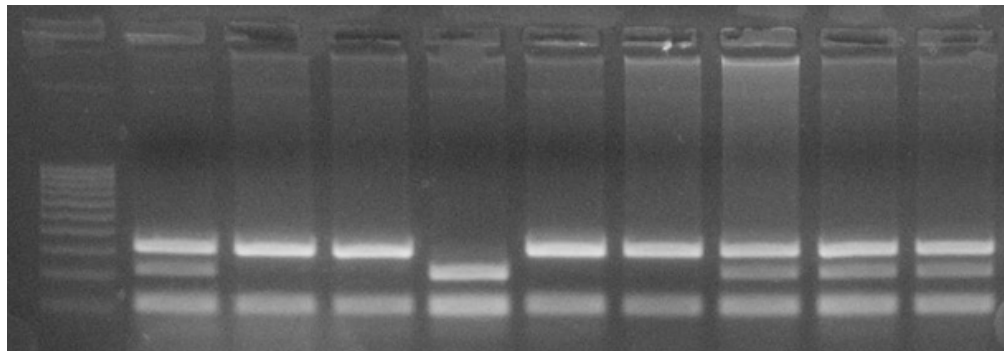

329 bp  
216 bp  
113 bp

L 1 2 3 4 5 6 7 8 9

Supplement: MOESM2 [file 9661672]
